# Supplementary material for: Evaluation of the diagnostic accuracy of laboratory-based screening for hepatitis C in dried blood spot samples: A systematic review and meta-analysis
Source: PubMed Central journal article supplement (PMC6514168; doi:10.1038/s41598-019-41139-8), 2019-05-13
Supplement: 41598_2019_41139_MOESM2_ESM.pdf [file 41598_2019_41139_MOESM2_ESM.pdf]

## TITLE PAGE

**Title:** Evaluation of the diagnostic accuracy of laboratory-based screening for hepatitis C in dried blood spot samples: A systematic review and meta-analysis

**Running head:** HCV screening in DBS samples

**Authors:** Sonia VÁZQUEZ-MORÓN <sup>1(¥)</sup>; Beatriz ARDIZONE JIMÉNEZ <sup>1(¥)</sup>; María A. JIMENEZ-SOUSA <sup>1</sup>; José M BELLON <sup>2,3</sup>; Pablo RYAN <sup>4</sup>; Salvador RESINO <sup>1(\*)</sup>

(¥), Both authors contributed equally to this study; (\*), Corresponding author

**Current affiliations:** (1) Unidad de Infección Viral e Inmunidad. Centro Nacional de Microbiología - Instituto de Salud Carlos III, Majadahonda, Spain; (2) Hospital General Universitario Gregorio Marañón, Madrid, Spain; (3) Instituto de Investigación Sanitaria Gregorio Marañón (IISGM), Madrid, Spain; (4) Hospital Universitario Infanta Leonor (HUIL). Vallecas, Madrid, Spain.

**Corresponding authors:** Salvador Resino, Centro Nacional de Microbiología, Instituto de Salud Carlos III (Campus Majadahonda); Carretera Majadahonda- Pozuelo, Km 2.2; 28220 Majadahonda (Madrid), Spain. Tel: +34 918 223 266; Fax: +34 915 097 946; e-mail: [sresino@isciii.es](mailto:sresino@isciii.es)

**Declarations of interest:** none.

### Author contributions:

Sonia Vázquez-Morón: investigation, methodology, writing – original draft

Beatriz Ardizone: investigation, methodology, writing – original draft

María A Jiménez-Sousa: investigation, methodology, writing – review and editing

José M Bellón: methodology: statistical analysis

Pablo Ryan: writing – review and editing

Salvador Resino: conceptualization, formal analysis, writing – original draft, supervision

**Character count of Title:** 150

**Count of References:** 56

**Character count of Running Head:** 28

**Count of Tables:** 2

**Word count of Abstract:** 257

**Count of Figures:** 4

**Word count of Keywords:** 5

**Count of Suppl. Data:** 12

**Words count for main body:** 4476

## Supplemental File 2. Summary of the quality assessment by using QUADAS-2.

### Bias (Anti – HCV Ab)

|                            | PATIENT SELECTION | INDEX TEST | REFERENCE STANDARD | FLOW AND TIMING |
|----------------------------|-------------------|------------|--------------------|-----------------|
| Brandao et al (2013)       | Low               | Low        | Low                | Low             |
| Croom et al (2006)         | Low               | Low        | Low                | Low             |
| Dokubo el al (2014)        | Low               | Unclear    | Low                | Low             |
| Flores et al (2017)        | Unclear           | Low        | Low                | Low             |
| Judd et al (2003)          | Unclear           | Low        | Low                | Unclear         |
| Kania et al (2013)         | Low               | Low        | Low                | Low             |
| Larrat et al (2012)        | Low               | Low        | Low                | Low             |
| Lima (2015)                | Low               | Low        | Low                | Low             |
| Marques et al (2016)       | Low               | Low        | Low                | Low             |
| Marques et al (2012)       | Low               | Low        | Low                | Low             |
| Mc Carron et al (1999)     | Low               | Unclear    | Low                | Low             |
| Mössner et al (2016)       | Low               | Low        | Low                | Low             |
| Nandagopal et al (2014)    | Low               | Low        | Low                | Low             |
| O'Brien et al (2001)       | Low               | Low        | Low                | Low             |
| Poiteau et al (2015)       | Low               | Unclear    | Low                | Low             |
| Rice et al (2012)          | Low               | Low        | Low                | Low             |
| Ross et al (2013)          | Low               | Low        | Low                | Low             |
| Soulier et al (2016)       | Low               | Low        | Low                | Low             |
| Tejada-Strop et al (2015)  | Low               | Low        | Low                | Low             |
| Tuailleon et al (2010)     | Low               | Low        | Low                | Low             |
| Vázquez-Morón et al (2018) | Low               | Low        | Low                | Low             |

### Applicability (Anti – HCV Ab)

|                            | PATIENT SELECTION | INDEX TEST | REFERENCE STANDARD |
|----------------------------|-------------------|------------|--------------------|
| Brandao et al (2013)       | Low               | Low        | Low                |
| Croom et al (2006)         | Low               | Low        | Low                |
| Dokubo el al (2014)        | Low               | Low        | Low                |
| Flores et al (2017)        | Low               | Low        | Low                |
| Judd et al (2003)          | Low               | Low        | Low                |
| Kania et al (2013)         | Low               | Low        | Low                |
| Larrat et al (2012)        | Low               | Low        | Low                |
| Lima (2015)                | Low               | Low        | Low                |
| Marques et al (2016)       | Low               | Low        | Low                |
| Marques et al (2012)       | Low               | Low        | Low                |
| Mc Carron et al (1999)     | Low               | Low        | Low                |
| Mössner et al (2016)       | Low               | Low        | Low                |
| Nandagopal et al (2014)    | Low               | Low        | Low                |
| O'Brien et al (2001)       | Low               | Low        | Low                |
| Poiteau et al (2015)       | Low               | Low        | Low                |
| Rice et al (2012)          | Low               | Low        | Low                |
| Ross et al (2013)          | Low               | Low        | Low                |
| Soulier et al (2016)       | Low               | Low        | Low                |
| Tejada-Strop et al (2015)  | Low               | Low        | Low                |
| Tuailleon et al (2010)     | Low               | Low        | Low                |
| Vázquez-Morón et al (2018) | Low               | Low        | Low                |

### Bias (NAT)

|                            | PATIENT SELECTION | INDEX TEST | REFERENCE STANDARD | FLOW AND TIMING |
|----------------------------|-------------------|------------|--------------------|-----------------|
| Bennett et al (2012)       | Low               | High       | Low                | Low             |
| De Crignis et al (2010)    | Low               | Unclear    | Low                | Low             |
| Dokubo el al (2014)        | Low               | Unclear    | Low                | Low             |
| Mössner et al (2016)       | Low               | Low        | Low                | High            |
| Ross et al (2013)          | Low               | Low        | Low                | Unclear         |
| Saludes et al (2018)       | Low               | Unclear    | Low                | Low             |
| Santos et al (2012)        | Low               | Low        | Low                | Low             |
| Solmone et al (2002)       | Unclear           | Unclear    | Unclear            | Unclear         |
| Soulier et al (2016)       | Low               | Low        | Low                | Low             |
| Vázquez-Morón et al (2018) | Low               | Low        | Low                | Low             |

### Applicability (NAT)

|                            | PATIENT SELECTION | INDEX TEST | REFERENCE STANDARD |
|----------------------------|-------------------|------------|--------------------|
| Bennett et al (2012)       | Low               | Low        | Low                |
| De Crignis et al (2010)    | Low               | Low        | Low                |
| Dokubo el al (2014)        | Low               | Low        | Low                |
| Mössner et al (2016)       | Low               | Low        | Low                |
| Ross et al (2013)          | Low               | Low        | Low                |
| Saludes et al (2018)       | Low               | Low        | Low                |
| Santos et al (2012)        | Low               | Low        | Low                |
| Solmone et al (2002)       | Low               | Low        | Low                |
| Soulier et al (2016)       | Low               | Low        | Low                |
| Vázquez-Morón et al (2018) | Low               | Low        | Low                |
