# Supplementary material for: Evaluation of the diagnostic accuracy of laboratory-based screening for hepatitis C in dried blood spot samples: A systematic review and meta-analysis
Source: PubMed Central journal article supplement (PMC6514168; doi:10.1038/s41598-019-41139-8), 2019-05-13
Supplement: 41598_2019_41139_MOESM8_ESM.pdf [file 41598_2019_41139_MOESM8_ESM.pdf]

## TITLE PAGE

**Title:** Evaluation of the diagnostic accuracy of laboratory-based screening for hepatitis C in dried blood spot samples: A systematic review and meta-analysis

**Running head:** HCV screening in DBS samples

**Authors:** Sonia VÁZQUEZ-MORÓN <sup>1(¥)</sup>; Beatriz ARDIZONE JIMÉNEZ <sup>1(¥)</sup>; María A. JIMENEZ-SOUSA <sup>1</sup>; José M BELLON <sup>2,3</sup>; Pablo RYAN <sup>4</sup>; Salvador RESINO <sup>1(\*)</sup>

(¥), Both authors contributed equally to this study; (\*), Corresponding author

**Current affiliations:** (1) Unidad de Infección Viral e Inmunidad. Centro Nacional de Microbiología - Instituto de Salud Carlos III, Majadahonda, Spain; (2) Hospital General Universitario Gregorio Marañón, Madrid, Spain; (3) Instituto de Investigación Sanitaria Gregorio Marañón (IISGM), Madrid, Spain; (4) Hospital Universitario Infanta Leonor (HUIL). Vallecas, Madrid, Spain.

**Corresponding authors:** Salvador Resino, Centro Nacional de Microbiología, Instituto de Salud Carlos III (Campus Majadahonda); Carretera Majadahonda- Pozuelo, Km 2.2; 28220 Majadahonda (Madrid), Spain. Tel: +34 918 223 266; Fax: +34 915 097 946; e-mail: [sresino@isciii.es](mailto:sresino@isciii.es)

**Declarations of interest:** none.

### Author contributions:

Sonia Vázquez-Morón: investigation, methodology, writing – original draft

Beatriz Ardizone: investigation, methodology, writing – original draft

María A Jiménez-Sousa: investigation, methodology, writing – review and editing

José M Bellón: methodology: statistical analysis

Pablo Ryan: writing – review and editing

Salvador Resino: conceptualization, formal analysis, writing – original draft, supervision

**Character count of Title:** 150

**Count of References:** 56

**Character count of Running Head:** 28

**Count of Tables:** 2

**Word count of Abstract:** 257

**Count of Figures:** 4

**Word count of Keywords:** 5

**Count of Suppl. Data:** 12

**Words count for main body:** 4476

**Supplemental File 8.** Meta-regression of potential sources of heterogeneity for anti-HCV antibody detection tests

-----  
**Meta-Regression (Study performed after 2010)**

| Var     | Coeff. | Std. Err. | p - value | RDOR | [95%CI]      |
|---------|--------|-----------|-----------|------|--------------|
| Cte.    | 7.451  | 0.5005    | 0.0000    | ---- | ----         |
| S       | -0.036 | 0.1742    | 0.8362    | ---- | ----         |
| CP_2010 | 2.138  | 0.9989    | 0.0415    | 8.49 | (1.09;65.89) |

-----  
 Tau-squared estimate = 1.5710 (Convergence is achieved after 11 iterations)  
 Restricted Maximum Likelihood estimation (REML)

No. studies = 30  
 Filter OFF  
 Add 1/2 to all cells of the studies with zero

-----  
**Meta-Regression (HIV coinfection)**

| Var  | Coeff. | Std. Err. | p - value | RDOR | [95%CI]      |
|------|--------|-----------|-----------|------|--------------|
| Cte. | 7.788  | 0.5057    | 0.0000    | ---- | ----         |
| S    | 0.077  | 0.1736    | 0.6624    | ---- | ----         |
| HIV  | 0.872  | 0.8345    | 0.3053    | 2.39 | (0.43;13.26) |

-----  
 Tau-squared estimate = 1.9008 (Convergence is achieved after 9 iterations)  
 Restricted Maximum Likelihood estimation (REML)

No. studies = 30  
 Filter OFF  
 Add 1/2 to all cells of the studies with zero

-----  
**Meta-Regression (Study performed in LMICs)**

| Var   | Coeff. | Std. Err. | p - value | RDOR | [95%CI]     |
|-------|--------|-----------|-----------|------|-------------|
| Cte.  | 8.523  | 0.4214    | 0.0000    | ---- | ----        |
| S     | -0.113 | 0.1511    | 0.4609    | ---- | ----        |
| LMICs | -2.252 | 0.6014    | 0.0009    | 0.11 | (0.03;0.36) |

-----  
 Tau-squared estimate = 0.6990 (Convergence is achieved after 6 iterations)  
 Restricted Maximum Likelihood estimation (REML)

No. studies = 30  
 Filter OFF  
 Add 1/2 to all cells of the studies with zero

-----  
**Meta-Regression (Type of HCV detection test)**

| Var  | Coeff. | Std. Err. | p - value | RDOR | [95%CI]      |
|------|--------|-----------|-----------|------|--------------|
| Cte. | 7.596  | 0.5026    | 0.0000    | ---- | ----         |
| S    | 0.047  | 0.1742    | 0.7886    | ---- | ----         |
| RDT  | 1.654  | 1.0389    | 0.1234    | 5.23 | (0.62;44.24) |
| CLA  | 1.200  | 1.2267    | 0.3369    | 3.32 | (0.27;41.34) |

-----  
 Tau-squared estimate = 1.7506 (Convergence is achieved after 10 iterations)  
 Restricted Maximum Likelihood estimation (REML)

No. studies = 30  
 Filter OFF  
 Add 1/2 to all cells of the studies with zero

-----  
**Meta-Regression (Anti-HCV antibody prevalence)**

| Var        | Coeff. | Std. Err. | p - value | RDOR | [95%CI]     |
|------------|--------|-----------|-----------|------|-------------|
| Cte.       | 7.881  | 1.1019    | 0.0000    | ---- | ----        |
| S          | 0.063  | 0.2164    | 0.7731    | ---- | ----        |
| Prevalence | 0.002  | 0.0177    | 0.8923    | 1.00 | (0.97;1.04) |

-----  
 Tau-squared estimate = 2.0556 (Convergence is achieved after 8 iterations)  
 Restricted Maximum Likelihood estimation (REML)

No. studies = 30  
 Filter OFF  
 Add 1/2 to all cells of the studies with zero

-----  
**Meta-Regression (Capillary or venous DBS samples)**

| Var         | Coeff. | Std. Err. | p - value | RDOR | [95%CI]     |
|-------------|--------|-----------|-----------|------|-------------|
| Cte.        | 8.325  | 0.5316    | 0.0000    | ---- | ----        |
| S           | -0.023 | 0.1891    | 0.9048    | ---- | ----        |
| Capilar_DBS | -0.951 | 0.7769    | 0.2314    | 0.39 | (0.08;1.90) |

-----  
 Tau-squared estimate = 1.7535 (Convergence is achieved after 8 iterations)  
 Restricted Maximum Likelihood estimation (REML)

No. studies = 30  
 Filter OFF  
 Add 1/2 to all cells of the studies with zero

-----  
**Meta-Regression (Study Size weights)**

| Var         | Coeff. | Std. Err. | p - value | RDOR | [95%CI]      |
|-------------|--------|-----------|-----------|------|--------------|
| Cte.        | 8.415  | 1.3487    | 0.0000    | ---- | ----         |
| S           | -0.161 | 0.1920    | 0.4100    | ---- | ----         |
| After_2010  | 1.686  | 1.1108    | 0.1440    | 5.40 | (0.54;54.38) |
| HIV         | 0.487  | 0.7151    | 0.5030    | 1.63 | (0.37;7.20)  |
| LMICs       | -1.446 | 0.8733    | 0.1127    | 0.24 | (0.04;1.45)  |
| RDT         | 1.445  | 1.0599    | 0.1872    | 4.24 | (0.47;38.45) |
| CLA         | 0.444  | 1.2302    | 0.7216    | 1.56 | (0.12;20.14) |
| Prevalence  | -0.011 | 0.0159    | 0.4877    | 0.99 | (0.96;1.02)  |
| Capilar_DBS | -0.752 | 0.6698    | 0.2745    | 0.47 | (0.12;1.90)  |

-----  
 Tau-squared estimate = 0.6703 (Convergence is achieved after 8 iterations)  
 Restricted Maximum Likelihood estimation (REML)

No. studies = 30  
 Filter OFF  
 Add 1/2 to all cells of the studies with zero

**Abbreviations:**

After\_2010, study performed after 2010  
 Capillary DBS, capillary or venous DBS samples  
 CI, confidence interval  
 Coeff., coefficient  
 Cte., constant term in the equation;  
 HCV test, type of HCV detection test (PCR or TMA)  
 HIV, HIV coinfection

LMICs, study performed in LMICs  
NA (---), not available  
Prevalence, anti-HCV antibody prevalence  
RDOR, relative diagnostic odds ratio  
S, indicator of threshold.  
Std. Err., standard error  
Var., variables
