# Supplementary material for: Evaluation of the diagnostic accuracy of laboratory-based screening for hepatitis C in dried blood spot samples: A systematic review and meta-analysis
Source: PubMed Central journal article supplement (PMC6514168; doi:10.1038/s41598-019-41139-8), 2019-05-13
Supplement: 41598_2019_41139_MOESM12_ESM.pdf [file 41598_2019_41139_MOESM12_ESM.pdf]

## TITLE PAGE

**Title:** Evaluation of the diagnostic accuracy of laboratory-based screening for hepatitis C in dried blood spot samples: A systematic review and meta-analysis

**Running head:** HCV screening in DBS samples

**Authors:** Sonia VÁZQUEZ-MORÓN <sup>1(¥)</sup>; Beatriz ARDIZONE JIMÉNEZ <sup>1(¥)</sup>; María A. JIMENEZ-SOUSA <sup>1</sup>; José M BELLON <sup>2,3</sup>; Pablo RYAN <sup>4</sup>; Salvador RESINO <sup>1(\*)</sup>

(¥), Both authors contributed equally to this study; (\*), Corresponding author

**Current affiliations:** (1) Unidad de Infección Viral e Inmunidad. Centro Nacional de Microbiología - Instituto de Salud Carlos III, Majadahonda, Spain; (2) Hospital General Universitario Gregorio Marañón, Madrid, Spain; (3) Instituto de Investigación Sanitaria Gregorio Marañón (IISGM), Madrid, Spain; (4) Hospital Universitario Infanta Leonor (HUIL). Vallecas, Madrid, Spain.

**Corresponding authors:** Salvador Resino, Centro Nacional de Microbiología, Instituto de Salud Carlos III (Campus Majadahonda); Carretera Majadahonda- Pozuelo, Km 2.2; 28220 Majadahonda (Madrid), Spain. Tel: +34 918 223 266; Fax: +34 915 097 946; e-mail: [sresino@isciii.es](mailto:sresino@isciii.es)

**Declarations of interest:** none.

### Author contributions:

Sonia Vázquez-Morón: investigation, methodology, writing – original draft

Beatriz Ardizone: investigation, methodology, writing – original draft

María A Jiménez-Sousa: investigation, methodology, writing – review and editing

José M Bellón: methodology: statistical analysis

Pablo Ryan: writing – review and editing

Salvador Resino: conceptualization, formal analysis, writing – original draft, supervision

**Character count of Title:** 150

**Count of References:** 56

**Character count of Running Head:** 28

**Count of Tables:** 2

**Word count of Abstract:** 257

**Count of Figures:** 4

**Word count of Keywords:** 5

**Count of Suppl. Data:** 12

**Words count for main body:** 4476

**Supplemental File 12.** Meta-regression of potential sources of heterogeneity for HCV-RNA detection tests.

-----  
**Meta-Regression(Study performed after 2010)**

| Var     | Coeff. | Std. Err. | p - value | RDOR | [95%CI]     |
|---------|--------|-----------|-----------|------|-------------|
| Cte.    | 7,648  | 0,4887    | 0,0000    | ---- | ----        |
| S       | -0,321 | 0,2923    | 0,3008    | ---- | ----        |
| CP_2010 | -0,772 | 1,2115    | 0,5399    | 0,46 | (0,03;7,16) |

-----  
 Tau-squared estimate = 0,1218 (Convergence is achieved after 7 iterations)  
 Restricted Maximum Likelihood estimation (REML)

No. studies = 12  
 Filter OFF  
 Add 1/2 to all cells of the studies with zero

-----  
**Meta-Regression(HIV coinfection)**

| Var  | Coeff. | Std. Err. | p - value | RDOR | [95%CI]     |
|------|--------|-----------|-----------|------|-------------|
| Cte. | 7,903  | 0,5027    | 0,0000    | ---- | ----        |
| S    | -0,330 | 0,2818    | 0,2714    | ---- | ----        |
| HIV  | -1,490 | 0,9604    | 0,1553    | 0,23 | (0,03;1,98) |

-----  
 Tau-squared estimate = 0,0000 (Convergence is achieved after 1 iterations)  
 Restricted Maximum Likelihood estimation (REML)

No. studies = 12  
 Filter OFF  
 Add 1/2 to all cells of the studies with zero

-----  
**Meta-Regression (Study performed in LMICs)**

| Var   | Coeff. | Std. Err. | p - value | RDOR | [95%CI]     |
|-------|--------|-----------|-----------|------|-------------|
| Cte.  | 7,701  | 0,5266    | 0,0000    | ---- | ----        |
| S     | -0,237 | 0,3241    | 0,4830    | ---- | ----        |
| LMICs | -0,771 | 1,1578    | 0,5222    | 0,46 | (0,03;6,35) |

-----  
 Tau-squared estimate = 0,0000 (Convergence is achieved after 1 iterations)  
 Restricted Maximum Likelihood estimation (REML)

No. studies = 12  
 Filter OFF  
 Add 1/2 to all cells of the studies with zero

-----  
**Meta-Regression(Study Size weights)**

| Var  | Coeff. | Std. Err. | p - value | RDOR | [95%CI]     |
|------|--------|-----------|-----------|------|-------------|
| Cte. | 8,275  | 0,6304    | 0,0000    | ---- | ----        |
| S    | -0,261 | 0,2859    | 0,3844    | ---- | ----        |
| PCR  | -1,456 | 0,8653    | 0,1268    | 0,23 | (0,03;1,65) |

-----  
 Tau-squared estimate = 0,0000 (Convergence is achieved after 1 iterations)  
 Restricted Maximum Likelihood estimation (REML)

No. studies = 12  
 Filter OFF

Add 1/2 to all cells of the studies with zero

-----  
**Meta-Regression (HCV-RNA prevalence)**

| Var        | Coeff. | Std. Err. | p - value | RDOR | [95%CI]     |
|------------|--------|-----------|-----------|------|-------------|
| Cte.       | 7,413  | 2,7803    | 0,0258    | ---- | ----        |
| S          | -0,343 | 0,3252    | 0,3197    | ---- | ----        |
| Prevalence | 0,002  | 0,0430    | 0,9709    | 1,00 | (0,91;1,10) |

-----  
Tau-squared estimate = 0,0900 (Convergence is achieved after 8 iterations)  
Restricted Maximum Likelihood estimation (REML)

No. studies = 12  
Filter OFF  
Add 1/2 to all cells of the studies with zero

-----  
**Meta-Regression (Capillary or venous DBS samples)**

| Var         | Coeff. | Std. Err. | p - value | RDOR | [95%CI]      |
|-------------|--------|-----------|-----------|------|--------------|
| Cte.        | 6,320  | 0,8672    | 0,0000    | ---- | ----         |
| S           | -0,467 | 0,2924    | 0,1448    | ---- | ----         |
| Capilar_DBS | 1,569  | 1,0021    | 0,1519    | 4,80 | (0,50;46,34) |

-----  
Tau-squared estimate = 0,0000 (Convergence is achieved after 1 iterations)  
Restricted Maximum Likelihood estimation (REML)

No. studies = 12  
Filter OFF  
Add 1/2 to all cells of the studies with zero

-----  
**Meta-Regression (Multivariate analysis)**

| Var         | Coeff. | Std. Err. | p - value | RDOR | [95%CI]        |
|-------------|--------|-----------|-----------|------|----------------|
| Cte.        | 3,229  | 5,3307    | 0,5774    | ---- | ----           |
| S           | -0,348 | 0,4530    | 0,4856    | ---- | ----           |
| CP_2010     | -0,258 | 1,8639    | 0,8964    | 0,77 | (0,00;136,52)  |
| HIV         | -3,153 | 2,3130    | 0,2445    | 0,04 | (0,00;26,28)   |
| LMICs       | -2,632 | 2,5837    | 0,3659    | 0,07 | (0,00;93,80)   |
| PCR         | 0,947  | 2,5010    | 0,7242    | 2,58 | (0,00;2672,47) |
| Prevalence  | 0,065  | 0,0739    | 0,4294    | 1,07 | (0,87;1,31)    |
| Capilar_DBS | 1,612  | 1,6478    | 0,3834    | 5,01 | (0,05;486,07)  |

-----  
Tau-squared estimate = 0,0000 (Convergence is achieved after 1 iterations)  
Restricted Maximum Likelihood estimation (REML)

No. studies = 12  
Filter OFF  
Add 1/2 to all cells of the studies with zero

**Abbreviations:**

After\_2010, study performed after 2010  
Capillary DBS, capillary or venous DBS samples  
CI, confidence interval  
Coeff., coefficient  
Cte., constant term in the equation;  
HCV test, type of HCV detection test (PCR or TMA)  
HIV, HIV coinfection  
LMICs, study performed in LMICs  
NA (---), not available

Prevalence, HCV-RNA prevalence  
RDOR, relative diagnostic odds ratio  
S, indicator of threshold.  
Std. Err., standard error  
Var., variables
